# Supplementary material
Source: Springer Nature journal article supplement (https://www.springermedizin.de/resource/supplementary/12885_2014_4791_MOESM2_ESM.pdf/9467270)

**HIF-1 $\alpha$** 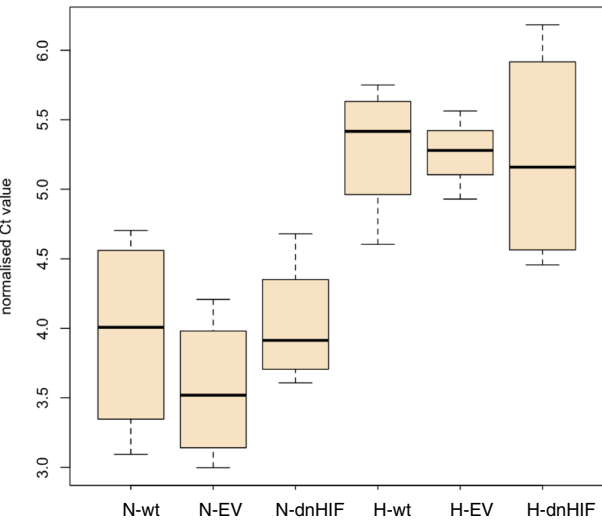**Angiopoietin-like 4**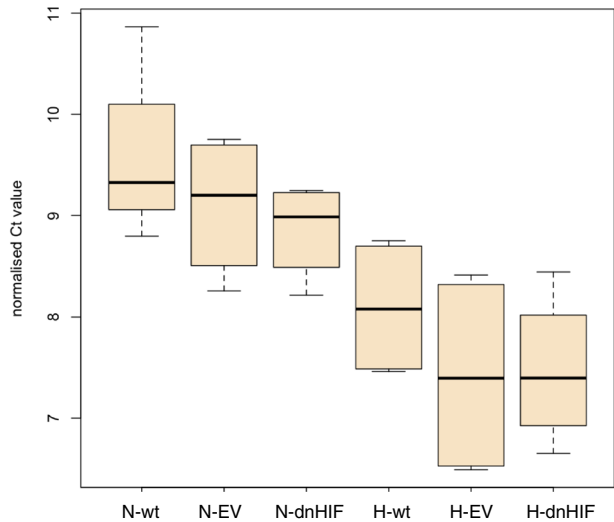

Supplement: MOESM2 [file 9467270]
